1

2

3 **Lef1 expression in fibroblasts maintains developmental potential in adult**  
4 **skin to regenerate wounds**

5

6 Quan M. Phan<sup>1</sup>, Gracelyn Fine<sup>1</sup>, Lucia Salz<sup>1</sup>, Gerardo G. Herrera<sup>1</sup>, Ben Wildman<sup>1</sup>, Iwona M.

7

Driskell<sup>1</sup>, and Ryan R. Driskell<sup>1,2\*</sup>

8

<sup>1</sup>School of Molecular Biosciences, Washington State University, Pullman, WA

9

<sup>2</sup>Center for Reproductive Biology, Washington State University, Pullman, WA

10

\* Corresponding Author: [ryan.driskell@wsu.edu](mailto:ryan.driskell@wsu.edu)

11

12

13

## Summary

14

15 Scars are a serious health concern that impacts the clinical outcome and long-term well-

16 being of burn victims and individuals with genetic skin conditions associated with wound healing.

17 In this study using mouse as the model, we identify regenerative factors in neonatal skin that will

18 transform adult skin to regenerate instead of repairing wounds with a scar, without perturbing

19 normal development and homeostasis. We utilized single-cell RNA-sequencing (scRNA-seq) to

20 probe unsorted cells from Regenerating, Scarring, Homeostatic, and Developing skin. Our results

21 revealed a transient regenerative cell type in Developing skin, called papillary fibroblasts, which

22 are defined by the expression of a canonical Wnt transcription factor Lef1. Tissue specific

23 ablation of Lef1 inhibited skin regeneration. Importantly, ectopic expression of Lef1 in dermal

24 fibroblasts did not disrupt development and aging, but primed adult skin to undergo enhanced

25 regeneration. Here, we reveal the possibility of transferring the regenerative abilities of neonatal

26 skin to adult tissue by expressing Lef1 in dermal fibroblasts. Finally, we have generated an

27 expandable web resource with a search function to display gene expression in the context of our

28 scRNA-seq data (<https://skinregeneration.org/>).

29

## Main

30           Understanding how to induce skin regeneration instead of scarring will have broad  
31 implications clinically and cosmetically (Walmsley et al., 2015b). One of the main characteristics  
32 of scars is the absence of hair follicles, indicating that their regeneration in a wound may be a  
33 critical step in achieving scar-less skin repair (Yang and Cotsarelis, 2010). Interestingly, human  
34 embryonic skin has the capacity to regenerate without scars (Lo et al., 2012). Similarly, neonatal  
35 and adult mouse skin has the capacity to regenerate small non-functional hair follicles under  
36 specific conditions (Figure 1c-d)(Ito et al., 2007; Rognoni et al., 2016; Telerman et al., 2017) .  
37 These insights have prompted efforts in the field to define the molecular triggers that promote hair  
38 development in skin, with the ultimate goal of devising a way to regenerate fully functional hairs  
39 in adult skin wounds as a therapeutic modality (Yang and Cotsarelis, 2010).

40           Human and mouse skin are similar in their overall structural complexity, indicating that  
41 mouse skin can be a useful model to study skin development and wound repair (Chen et al.,  
42 2013). Murine hair follicle and skin development primarily occurs between embryonic day 12.5  
43 (E12.5) to post-natal day 21 (P21) (Muller-Rover et al., 2001). During this time different fibroblast  
44 lineages are established that respond to the changes in the environment to support hair follicle  
45 and skin development (Driskell et al., 2013; Jiang et al., 2018; Rinkevich et al., 2015; Rognoni et  
46 al., 2016). Fibroblasts that support hair follicle development differentiate from the papillary  
47 fibroblast lineage, into dermal papilla (DP), dermal sheath (DS), and arrector pili (AP) cells  
48 (Driskell et al., 2013; Plikus et al., 2017). Reticular fibroblasts, which cannot differentiate into  
49 papillary fibroblast lineages, secrete Extra-Cellular-Matrix and form into adipocytes (Driskell et al.,  
50 2013; Schmidt and Horsley, 2013). By post-natal day 2 (P2) fibroblast heterogeneity is fully  
51 established with the presence of the defined layers of the dermis (Figure 1a)(Driskell et al., 2013).  
52 Skin maturation occurs after P2 with the formation of the AP and the completion of the first hair  
53 follicle cycle, which results in the loss of a defined papillary fibroblast layer (Figure 1b) (Driskell et

54 al., 2013; Rognoni et al., 2016; Salzer et al., 2018). We have previously shown that papillary  
55 fibroblasts are the primary source of de-novo dermal papilla during skin development, which are  
56 required for hair formation (Driskell et al., 2013). Furthermore, it has been suggested that adult  
57 murine skin form scars due to the lack of a defined papillary layer (Driskell et al., 2013; Driskell  
58 and Watt, 2015). Consequently, expanding this layer in adult skin might support skin regeneration  
59 in adult mice.

60 The use of scRNA-seq in the murine skin has established useful cell atlases of the skin  
61 during development and homeostasis (Guerrero-Juarez et al., 2019; Haensel et al., 2020; Joost  
62 et al., 2020; Joost et al., 2018; Joost et al., 2016; Mok et al., 2019). In addition, scRNA-seq studies  
63 investigating wound healing have so far focused on comparing scarring, non-scarring, or  
64 regenerating conditions (Guerrero-Juarez et al., 2019; Haensel et al., 2020; Joost et al., 2018).  
65 These studies have helped to identified key markers of the newly discovered skin fascia, such as  
66 Gpx3, which recently has been shown to contribute to scar formation (Correa-Gallegos et al.,  
67 2019; Grachtchouk et al., 2000; Joost et al., 2020). These, scRNA-seq studies have revealed that  
68 transgenic activation of the Shh pathway in the alpha-smooth-actin cells in scarring wounds,  
69 which includes pericytes, blood vessels, and myofibroblasts, can support small non-functional  
70 hair regeneration (Lim et al., 2018). However, activation of Shh pathway in dermal fibroblasts is  
71 associated with malignant phenotypes and will perturb development and homeostasis such that  
72 it may not be a safe target to support human skin regeneration clinically (Fan et al., 1997;  
73 Grachtchouk et al., 2000; Oro et al., 1997; Sun et al., 2020). Altogether, these findings suggest  
74 that an overall comparison of developing, homeostatic, scarring, and regenerating skin conditions  
75 will yield important discoveries for molecular factors that can safely support skin regeneration  
76 without harmful side effects.

77 The Wnt signaling pathway is involved in regulating development, wound healing, disease  
78 and cancer (Nusse and Clevers, 2017). Studies that activated Wnt and  $\beta$ -catenin in skin have led

79 to important discoveries for wound healing but have produced contrasting results in the context  
80 of fibroblast biology and hair follicle formation (Chen et al., 2012; Enshell-Seijffers et al., 2010;  
81 Hamburg-Shields et al., 2015; Lim et al., 2018; Rognoni et al., 2016). Wnt is a secreted protein  
82 that activates a cascade of events that stabilizes nuclear  $\beta$ -catenin, which operates as a powerful  
83 co-transcription factor of gene expression. Importantly,  $\beta$ -catenin alone cannot activate the  
84 expression of Wnt target genes without co-transcription factors. There are four Wnt co-  
85 transcription factors Tcf1 (Tcf7), Lef1, Tcf3 (Tcf7l2), and Tcf4 (Tcf7l2). These co-transcription  
86 factors modulate the functional outcome of Wnt signaling by binding to different target genes  
87 (Adam et al., 2018; Nguyen et al., 2009; Yu et al., 2012). In the context of wound healing and  
88 regeneration, it is not known how differential expression of Tcf/Lef can modulate fibroblast activity  
89 via Wnt signaling.

90         Since it has been shown that embryonic and neonatal skin have the potential to regenerate  
91 hair follicles upon wounding (Hu et al., 2018; Rognoni et al., 2016), we set out to identify the cell  
92 types and molecular factors that define this ability in order to transfer this regenerative potential  
93 to adult tissue. Our work has identified Lef1, as the factor in fibroblast of developing skin, that can  
94 transform adult tissue to regenerate without harmful phenotypes.

## 95 **Developing papillary fibroblasts are a transient cell population that supports hair follicle** 96 **regeneration in wounds**

97         We and others have previously shown that there are differences between neonatal and  
98 adult skin in terms of their cellular and biological properties (Ge et al., 2020; Rognoni et al., 2016;  
99 Salzer et al., 2018). These differences influence how skin can repair or if it can regenerate hair  
100 follicles in a wound. We showed that neonatal Developing skin at P2 (Figure 1a) can regenerate  
101 small hair follicles 7 days after wounding (7dpw) (Figure 1c), while adult Homeostatic skin at P21  
102 (Figure 1b) heals by scarring 7dpw (Figure 1d). Consequently, we hypothesized that Developing  
103 or Regenerating skin contains cell types that are distinct and will support hair follicle reformation

104 in wounds. In order to identify the cell types and molecular pathways that define the ability of  
105 Developing skin to regenerate we performed a comparison of unsorted cells from 4 conditions  
106 using scRNA-seq (Figure 1e). A total of 66,407 cells from 12 libraries (n=3 for each condition) met  
107 the preprocessing threshold and were used for downstream analysis. Each condition was  
108 represented as different colors (Figure 1a). UMAP plotting of the 66,407 sequenced cells revealed  
109 distinct clusters (Figure 1f-g). To identify cell clusters, we used Louvain modulating analysis (Joost  
110 et al., 2016; Wolf et al., 2018), which resulted in 18 distinct clusters (Figure 1g). We assigned 7  
111 main classes of cells to the clusters. Keratinocytes represented the largest portion of cell types in  
112 the analysis (blue clusters - 0,1,2,5,8,9,11,12,17) (Figure 1h). We identified three distinct  
113 fibroblast clusters (green clusters -3,4,16). These clusters expressed *Twist2/Dermo1*, *Pdgfra*, and  
114 *En1* (Figure 1h). We also identified other clusters based on their distinct gene expression profile  
115 (Figure 1h), such as immune cells (cluster 6), vasculature (cluster 7, 15), Schwann cells (cluster  
116 10), melanocytes (cluster 13), and a pericyte population (cluster 14).

117 To identify a unique cell type that supports the ability to regenerate hair follicles in  
118 Developing skin we quantified the number of cells for each condition within a cluster (Figure 1i).  
119 Unexpectedly, there was no cluster defined by the Regenerating condition. Regenerating (green)  
120 and Scarring (red) conditions were found in similar proportions amongst Keratinocytes,  
121 lymphocytes/blood, melanocytes, Schwann cells, blood vessels and fibroblasts (Figure 1i).  
122 However, there were two clusters that were distinct based on the representation of cell types from  
123 a specific condition. Cluster 16 consisted of 99.9% of fibroblasts from Homeostatic skin, while  
124 Cluster 3 consisted of 67.8% of Developing fibroblasts (Figure 1i). In addition, cluster 4 consisted  
125 of 25.7% of Regenerating condition, 57.6% of the Scarring conditions. Since fibroblasts are known  
126 to play a critical (crucial) role in regulating hair follicle reformation in wounds by differentiating into  
127 de-novo DP (Driskell et al., 2013; Plikus et al., 2017; Rognoni et al., 2016), we chose to further  
128 analyze clusters 3, 4, and 16.

129 We subset the fibroblast clusters 3,4,16 and re-clustered them by performing an  
130 integration analysis (Polanski et al., 2020). This allowed us to test if different fibroblast subtypes,  
131 such as the papillary and reticular/hypodermal/fascia lineages, would be represented uniquely  
132 within a condition (Figure 1j-l). UMAP plotting of the integrated analysis and Louvain clustering  
133 revealed 10 distinct clusters (Figure 1k). The largest cluster (cluster 0) expressed markers of the  
134 papillary fibroblast lineage (Figure 1e-g). Four clusters (clusters 1,2,3,4) distinctly expressed  
135 markers of the reticular/hypodermal/fascia layers of the dermis (Figure 1k; Supp Fig 1a) (Correa-  
136 Gallegos et al., 2019; Joost et al., 2018). Three clusters (clusters 6,7,8) expressed markers of the  
137 dermal papilla and dermal sheath (Figure 1e-g). One cluster was distinctly represented by alpha-  
138 smooth-muscle actin indicating a myofibroblast subtype (cluster 9).

139 To identify the condition that is represented within specific fibroblast subtypes, we  
140 quantified the percentage of cells from each condition within the sub-clusters (Figure 1l). Our  
141 results revealed that four clusters were uniquely represented by four conditions. The  
142 myofibroblast sub-cluster (cluster 9) contained 69% of cells from the Regenerating condition,  
143 while a hypodermal fascia cluster (cluster 1) contained 92.2% of cells from the Scarring condition.  
144 Cluster 4, identified by the high expression of Cochlin (Coch), an inner ear ECM protein, contained  
145 80.8% of cells from the Homeostasis condition and a DP/DS sub-clusters (cluster 6) contained  
146 95.0% of cells from the Homeostasis condition. The papillary fibroblast cluster (cluster 0)  
147 contained 98.1% of cells from the Developing skin condition. The DP sub-cluster (cluster 7)  
148 consisted of 56.5% cells from the Developing condition and 37.1% cells from the Regenerating  
149 condition. These results indicate that there is a distinct separation between fibroblast sub-types  
150 that support regeneration (papillary fibroblast) or scarring (reticular/hypodermal/fascia) based on  
151 conditions.

152 In homeostatic skin DP and DS are critical for hair follicle growth and cycling. However,  
153 they do not migrate into wounds to support hair follicle reformation (Johnston et al., 2013; Kaushal

154 et al., 2015). Myofibroblasts migrate into wounds but have not been shown to differentiate into  
155 dermal papilla during hair follicle regeneration and is a major characteristic of scarring (Lim et al.,  
156 2018; Plikus et al., 2017). Furthermore, reticular and fascia fibroblasts contribute to scar  
157 formation but not differentiate into dermal papilla (Correa-Gallegos et al., 2019; Driskell et al.,  
158 2013). Since our goal was to identify a cell type that uniquely represented the ability to support  
159 hair follicle regeneration in wounds, we focused on cluster 0 which are papillary fibroblasts  
160 represented by the Regenerating condition. Papillary fibroblasts migrate into wounds and support  
161 the reformation of hair follicles by differentiating into dermal papilla (Driskell et al., 2013; Rognoni  
162 et al., 2016). We conclude that the papillary fibroblasts found only in the Developing condition are  
163 unique and might harbor the potential to support hair follicle regeneration in wounds.

#### 164 **Lef1 drives the papillary lineage trajectory in Developing fibroblasts**

165 We have previously identified molecular markers of papillary, reticular and hypodermal  
166 fibroblasts in Developing P2 skin (Driskell et al., 2013). P2 developing skin is a critical time point  
167 to study the regenerative properties that can be transferrable to adult tissue. Consequently, we  
168 have generated a web-resource for this time point (<https://skinregeneration.org/>). Dpp4/CD26  
169 marks the papillary fibroblast region with the highest expression with detectable signal in the  
170 reticular layer, which expresses high levels of Dlk1/Pref1 (Figure 2a-b). The hypodermis is co-  
171 labeled with Dlk1/Pref1 and Ly6a/Sca1 expression (Figure 2b-c). We subset and re-clustered the  
172 Developing P2 fibroblasts to generate a UMAP to produce a cell atlas in the context of previously  
173 defined markers of fibroblast heterogeneity (Figure 2d). Importantly, we found that PDGFRa, a  
174 pan fibroblast marker, was expressed in all populations (Figure 2d) (Collins et al., 2011).  
175 Dlk1/Pref1 and Ly6a/Sca1 labeled clusters above a population that expressed the newly identified  
176 fascia marker Gpx3 (Figure 2d). Dpp4/CD26 was detected above the Dlk1/Pref1 clusters. Dkk1,  
177 a newly identified papillary marker (Rognoni et al., 2016), was expressed in an adjacent  
178 population to the Dpp4/CD26 population. MKi67 marked cells undergoing division, but importantly



179 overlapped with Dpp4/CD26 and Dkk1 expression, suggesting that this cluster represented  
180 dividing papillary fibroblasts. Acan, a newly identified DS marker (Heitman et al., 2020), was  
181 detected in a small population adjacent to the cluster which expressed the DP marker Corin  
182 (Enshell-Seijffers et al., 2008). We conclude that our scRNA-seq analysis of Developing  
183 fibroblasts supports previously identified markers defining fibroblast lineages but expose the  
184 existence of two papillary fibroblast populations, suggesting additional heterogeneity to be  
185 investigated in future studies.

186 To identify factors that define the papillary fibroblast clusters we performed an RNA  
187 Velocity analysis on Developing fibroblasts (Figure 2e) (Methods: Github weblink). RNA Velocity  
188 is a function of scRNA-seq that computationally compares the ratio of spliced/unspliced mRNA  
189 sequencing data, within a cell, to establish an estimated trajectory of differentiation, projected as  
190 arrows on a UMAP plot (Figure 2e) (La Manno et al., 2018). The arrows are defined by a list of  
191 driver genes (Supp Table 1). Interestingly, the estimated trajectories of the clusters support our  
192 previous work indicating that cells that express Ly6a/Sca1 do not differentiate into the papillary  
193 lineage (Driskell et al., 2013). We probed the list of Velocity driver genes (Supp Table 2) using  
194 GO Pathway analysis (Figure 2f). The Wnt signaling pathway was one of the most significant  
195 pathways represented. RNA Velocity analysis also ranks the top 5 drivers for each cluster, which  
196 revealed two canonical Wnt transcription factors with opposing trajectories (Figure 2g-h). Lef1,  
197 driving trajectories of 2 papillary clusters and Tcf4 driving the hypodermal cluster. Importantly,  
198 Lef1 is an early DP marker capable of enhancing human hair follicle growth in vitro, while Tcf4 is  
199 associated with fibrotic scars (Mok et al., 2019)( <https://doi.org/10.1101/2020.01.05.895334>). We  
200 projected the velocity of Lef1 and Tcf4 as gradients of color on UMAPs of Developing fibroblasts  
201 (Figure 2h) to visualize the direction of their trajectories. The velocity of Lef1 was positive in the  
202 direction of all papillary clusters including the dermal papilla and dermal sheath. Tcf4 velocity was  
203 positive toward the reticular/hypodermal/fascia clusters. To validate Lef1 expression in papillary

204 fibroblasts, we immunostained Developing (P2) and Homeostatic (P21) tissue samples (Figure  
205 2i-l). We found Lef1 expression in the papillary region of Developing skin, which was lost in adult  
206 dermis and correlates with the loss of regenerative ability in Homeostatic skin. Likewise, we  
207 confirmed that Tcf4 was detected in the reticular/hypodermis throughout Developing skin and in  
208 Homeostasis but not in papillary fibroblasts. Interestingly, it has been previously shown that the  
209 response to Wnt signals could be specified by the different Tcf factors expressed (Adam et al.,  
210 2018). Since Lef1 has previously been defined as an early DP marker (Mok et al., 2019) we  
211 hypothesize that Lef1 marks papillary fibroblasts capable of supporting hair follicle regeneration  
212 in wounds.

### 213 **Neonatal skin regeneration requires Lef1 expression in fibroblasts**

214 Based on our scRNA-seq findings, we hypothesized that Lef1 defines a neonatal papillary  
215 fibroblast that supports skin regeneration during neonatal wound healing. To test if Lef1 in  
216 fibroblasts is required to support neonatal regeneration, we produced a tissue specific knockout  
217 model. We utilized the fibroblast specific promoter Dermo1/Twist2 to drive Cre expression, bred  
218 with a mouse line with flox sites flanking Exon 7 and 8 of the Lef1 locus (Yu et al., 2012). We  
219 called this mouse line DermLef1KO (Figure 3a). DermLef1KO mice were viable and fertile with  
220 small shifts in hair follicle phenotypes that resulted in less dense fur (Manuscript in Prep). We  
221 confirmed dermal Lef1 ablation from the papillary fibroblast at P2 and from adult DP by  
222 immunostaining (Figure 3b-e). We also performed 2mm wounds on P2 DermLef1KO and wild  
223 type littermates harvesting at 7dpw (Figure 3f). Our analyses revealed that Lef1 was expressed  
224 in the de-novo DP and regenerating hair follicle buds of wild type mice (Figure 3g,i), but that  
225 wounded DermLef1KO mice lacked regeneration (Figure 3h,j,k). We conclude that Lef1  
226 expression in neonatal fibroblasts is required for hair follicle regeneration in wounds.

### 227 **Dermal Lef1 expression primes adult skin to enhance regeneration in large wounds**

228 Our scRNA-seq data, together with tissue specific knockout, suggests that skin can be  
229 primed to regenerate during development and homeostasis. We hypothesize that constitutively  
230 active Lef1 expression in dermal fibroblasts will prime skin to support regeneration. To induce  
231 Lef1 expression in fibroblasts, we utilized a previously published transgenic mouse model Lef1KI  
232 (Lynch et al., 2016) bred with Dermo1/Twist2-Cre mouse line called the DermLef1KI line (Figure  
233 4a). We verified that Lef1 was expressed in all dermal fibroblast compartments in DermLef1KI  
234 mice during development and in adult homeostatic skin conditions (Figure 4b-e). Importantly, the  
235 only phenotype detected was the early entry of the hair follicle cycling into anagen at P21 in  
236 DermLef1KI mice (Figure 2d-e). In addition, DermLef1KI mice have similar life spans as wild type  
237 mice without any adverse effects (Supp Fig 3). Our results reveal that induced expression of Lef1  
238 in fibroblasts does not negatively affect the development and homeostasis of murine skin.

239 Adult skin normally does not regenerate but has the capacity to reform non-functional hair  
240 follicles (small and lack arrector pili) in wounds 1cm<sup>2</sup> or larger.(Ito et al., 2007) To test if  
241 overexpression of Lef1 in adult dermal fibroblasts enhances hair regeneration in adult skin, we  
242 wounded wild type (Lef1KI) and DermLef1KI mice at P24 with 1.2cm<sup>2</sup> wounds and harvested at  
243 24dpw (Figure 4f). Our analysis comparing Lef1KI and DermLef1KI wound beds revealed  
244 enhanced hair regeneration (Figure 4f-k). There were 5 times more regenerating hair follicles on  
245 average in DermLef1KI wound beds compared to wild type wounds (Figure 4j-k). The non-  
246 functional hair follicles that typically regenerate in large adult wounds are small and lack the  
247 arrector pili, a smooth muscle that makes hair stand up when contracted. Strikingly, the hair  
248 follicles regenerating in the DermLef1KI wound beds contained arrector pili (Figure 4i) and were  
249 larger than hair follicles found in wild type wounds. This extensive ability to regenerate has only  
250 been reported to occur in the African Spiny Mouse (*Acomys*) model.(Jiang et al., 2019; Seifert et  
251 al., 2012) We conclude that Lef1 expression in dermal fibroblasts primes skin to enhances  
252 regeneration.

## 253 **Dermal Lef1 transforms scarring wounds to be regenerative**

254 Wound healing studies utilize a standardized approach to take into account the hair follicle  
255 cycle, which influences the wound healing process.(Ansell et al., 2011) Consequently, the bulk of  
256 wound healing and regeneration studies are performed at 3 weeks of age (~P21) or at 7-8 weeks  
257 of age (~P57) (Gay et al., 2013; Guerrero-Juarez et al., 2019; Ito et al., 2007; Lim et al., 2018;  
258 Plikus et al., 2017; Plikus et al., 2008). In addition, a standard size wound of roughly 8mm in  
259 diameter or smaller is used, which heal by scarring (Driskell et al., 2013; Lim et al., 2018; Rognoni  
260 et al., 2016). Since Lef1KI mice showed enhanced regenerative capacity in large wounds, we  
261 explored the regeneration potential of DermLef1KI skin, in wounds that normally scar. To  
262 determine if the hair follicle cycle influences skin regeneration we performed wounds at different  
263 time points. P24 which undergoes a hair follicle cycle during wound healing. P40 which heals  
264 during the resting phase of the hair cycle. And P90 which is the beginning of the un-synchronized  
265 hair follicle cycling that occurs in adult mice (Figure 5a). Scars formed in wounds performed at  
266 P24 in both WT and DermLef1KI mice (Figure 5b-c,l). However, hair follicle regeneration with  
267 arrector pili occurred in wounds performed at P40 and P90 in DermLef1KI mice (Figure 5d-k, l,  
268 Supp Fig 4) (Figure 4h-k). We conclude that Lef1 expression in fibroblasts induces skin to support  
269 hair follicle regeneration in wounds that heal outside of the hair follicle cycle.

270 Our wound healing studies mirror previous work suggesting that the size of a wound can  
271 dictate the potential of skin to regenerate instead of scar (Ito et al., 2007). To explain 'why size  
272 matters' we investigated and mapped the timing of wound closure and regeneration in the context  
273 of molecular signals within the dermal macro-environment that are dynamically changing  
274 throughout the hair follicle cycle (Plikus et al., 2008; Wang et al., 2017). Previous studies have  
275 defined the activators and inhibitors that regulate hair follicle cycling during this time (Wang et al.,  
276 2017) (Supp Table 3). Activators include the Wnt signaling pathway, Noggin, Tgfb, and fibroblast  
277 markers such as PDGFRa. Inhibitors include the BMP signaling pathway. These activators and

278 inhibitors have been previously shown to modulate Lef1 activity (Jamora et al., 2003). To explain  
279 why DermLef1KI mice scar at P24, we generated a diagram of wound re-epithelization and  
280 healing time points comparing 8mm circular wounds to 1.2cm<sup>2</sup> wound in the context of gene  
281 expression for inhibitors and activators at all time points during the hair follicle cycle (Figure 5I).  
282 8mm circular wounds re-epithelialize 7dpw (Driskell et al., 2013) in a macro-environment with high  
283 levels of Lef1 inhibitors, which are not inductive to hair follicle formation (Figure 5I). In contrast,  
284 large 1.2cm<sup>2</sup> wounds re-epithelialize during the time point of the hair cycle that has high activators  
285 and low inhibitors (Figure 5I). We conclude that the size of a wound dictates the time point as to  
286 when a wound closure is associated with inhibitor or inductive regenerative signals.

## 287 **Discussion**

288 It is well established that embryonic and neonatal skin has the potential to heal in a scar-  
289 less manner (Walmsley et al., 2015a). However, the cell types and signals that can transfer this  
290 ability to adult skin have not been identified. In this study we identify Developing papillary  
291 fibroblasts as a transient cell population that is defined by Lef1 expression. Inducing Lef1  
292 expression in adult fibroblasts will prime skin to support enhanced hair follicle regeneration.  
293 Interestingly, ectopic Lef1 expression in fibroblasts did not result in any adverse phenotypes with  
294 phenotypically normal mice (Supp Fig 3).

295 scRNA-seq has provided an unprecedented insight in the cell types and molecular  
296 pathways that are represented within regenerating and scarring wounds (Guerrero-Juarez et al.,  
297 2019; Haensel et al., 2020; Joost et al., 2018). For example, comparisons of these different  
298 repairing conditions have identified the activation of the Shh pathway as a key pathway to support  
299 hair follicle regeneration in wounds of different sizes (Lim et al., 2018). However, the activation of  
300 ectopic Shh in either the epidermis or dermis is associated with unwanted phenotypes and cancer  
301 (Fan et al., 1997; Grachtchouk et al., 2000; Oro et al., 1997; Sun et al., 2020). Unexpectedly, we  
302 discovered a transient papillary fibroblast population that is defined by Lef1 expression in

303 Developing skin instead of in Regenerating conditions. Importantly, our comparative analysis of  
304 Regenerating and Scarring wounds reveals their similarities (Figure 1i) more than their differences  
305 suggesting that the wound environment is a powerful driving force for gene expression even in a  
306 heterogeneous population of cells. Consequently, the basic mechanisms occurring during  
307 development and maintenance of neonatal tissue may hold the keys to transforming adult tissue  
308 to regenerate instead of scarring.

309         Studies involving the activation of the Wnt and  $\beta$ -catenin pathways in skin have led to  
310 important discoveries in wound healing research, but have produced contrasting results in the  
311 context of fibroblast biology and hair follicle formation (Chen et al., 2012; Hamburg-Shields et al.,  
312 2015; Ito et al., 2007; Lim et al., 2018; Mastrogiannaki et al., 2016; Rognoni et al., 2016). The  
313 activation of  $\beta$ -catenin in fibroblasts during wound healing has been shown to inhibit hair follicle  
314 reformation in scars (Lim et al., 2018; Rognoni et al., 2016) while deactivating Wnt signaling  
315 inhibited hair reformation (Myung et al., 2013). Moreover, persistent Wnt activity in the dermis has  
316 been recently shown to drive WIHN towards fibrotic wound healing (Gay et al., 2020). In contrast,  
317 the activation of  $\beta$ -catenin during development increases hair formation and size (Chen et al.,  
318 2012; Enshell-Seiffers et al., 2010). One explanation for these conflicting results is the presence  
319 of different fibroblast lineages present in either development or wounds, which express different  
320 Lef/Tcf factors to direct a Wnt/ $\beta$ -catenin specific response (Driskell et al., 2013; Philippeos et al.,  
321 2018; Rognoni et al., 2016). We and others have shown that Lef1 is expressed in embryonic and  
322 neonatal papillary fibroblasts, which is lost in adult fibroblasts (Driskell et al., 2013; Mastrogiannaki  
323 et al., 2016; Philippeos et al., 2018; Rognoni et al., 2016). Here we demonstrate that Lef1 is a key  
324 inductive element in developing fibroblasts that supports hair follicle formation in adult wounds.  
325 Our data indicates that Lef1 expression in fibroblasts primes a response to Wnt signals to support  
326 hair follicle neogenesis and arrector pili reformation, without negative affects to development or  
327 homeostasis, as seen in other models (Seifert et al., 2012). Our results align with studies that

328 induced Lef1 expression in cultured human dermal papilla cells to enhance hair follicle formation  
329 in vitro (Abaci et al., 2018). In humans, at the age of 50, the quality of the papillary dermis gradually  
330 deteriorates, which correlates with decreased wound healing abilities (Haydont et al., 2019;  
331 Marcos-Garces et al., 2014). Our data suggests that activating the human papillary region to  
332 retain its identity by expression of Lef1 has the potential to enhance wound healing in humans.

333

## 334 **Material and Methods**

335 **Mouse models.** All mice were outbred on a C57BL6/CBA background, with male and female  
336 mice used in all experiments. The following transgenic mouse lines were used in this study,  
337 Twist2-Cre (Cat# 008712). The ROSA26-CAG-flox-GFP-STOP-flox-Lef1 and Lef1-flox-Exon7,8-  
338 flox mouse has been previously described (Lynch et al., 2016; Yu et al., 2012). Wild type mice  
339 utilized in scRNA-seq experiments were an outbred background of C57BL6/CBA mice.

340 **Wounding experiments.** All wounding experiments were done in accordance with the guidelines  
341 from approved protocols Washington State University IACUC. Mice were wounded at post-natal  
342 day (P) 2, P24, P40 and P90 as stated in the results section. All wounding experiments were  
343 carried out with mice under anesthetization. The dorsal hair was shaved, and wounding areas  
344 were disinfected. For full-thickness circular wound, 2mm and 8mm punch biopsy and surgical  
345 scissors were used on P2 and P24/P40 mice, respectively. For large wounds, 1.44cm<sup>2</sup> (1.2 x 1.2  
346 cm) squares were excised using surgical scissors. Wounds were harvested at 7 dpw, 14 dpw, 24  
347 dpw, and 30 dpw.

348 **Horizontal whole mount.** This procedure was described in Salz et al., 2017 (Salz and Driskell,  
349 2017). Briefly, full thickness skin samples were collected and fixed in 4% Paraformaldehyde  
350 (PFA), before being frozen in OCT compound in cryo-block. Samples were sectioned using

351 cryostat at 60 mm thickness. Skin sections were then stained with primary antibodies at 4C  
352 overnight in PB buffer and with secondary antibodies in PB buffer for one hour. Samples were  
353 mounted on glass cover slip with glycerol as mounting medium.

354 **Generation of Single cell RNA-Sequencing data.** Cells isolation procedure was previously  
355 described in Jensen and Driskell 2009 (Jensen et al., 2010). Single-cell cDNA libraries were  
356 prepared using the 10X Genomics Chromium Single Cell 3' kit according to the company's  
357 instruction. For each condition, 3 mice were used to generate 3 separate libraries, making it a  
358 total of 12 libraries across all 4 conditions. All samples were processed individually. The prepared  
359 libraries were sequenced on Illumina HiSeq 4000 (100 bp Paired-End). Demultiplexed Paired-  
360 End fastq files were aligned to mm10 reference genome using 10X Genomics CellRanger function  
361 (Cellranger version 3.0.2). The outputs of Cellranger alignment were used to create loom files by  
362 Velocity "run10x" function (La Manno et al. 2018). Loom files are the preferred input data for  
363 scVelo package to perform RNA Velocity analysis (Bergen et al. 2019).

364 **Single cell RNA-Seq data preprocessing.** For basic filtering of our data, we filtered out cells  
365 have expressed less than 200 genes and genes that are expressed in less than 3 cells. To ensure  
366 that the data is comparable among cells, we normalized the number of counts per cell to 10,000  
367 reads per cell as suggested by the scanpy pipeline (Wolf et al. 2018). Data were then log-  
368 transformed for downstream analysis and visualization. We also regressed out effects of total  
369 counts per cell and the percentage of mitochondrial genes expressed, then scaled the data to unit  
370 variance with the maximum standard deviation 10.

371 **Single cell RNA-Seq data analysis.** Neighborhood graph of cells was computed using PCA  
372 presentation (n PCs = 40, n neighbors = 10). The graph was embedded in 2 dimensions using  
373 Uniform Manifold Approximation and Projection (UMAP) as suggested by scanpy developers.  
374 Clusters of cell types were defined by Louvain method for community detection on the generated



375 UMAP graph at resolution of 0.2. The analysis pipeline is published on the Driskell lab Github  
376 page as Jupyter Notebook ([https://github.com/DriskellLab/Priming-Skin-to-Regenerate-by-  
377 Inducing-Lef1-Expression-in-Fibroblasts-](https://github.com/DriskellLab/Priming-Skin-to-Regenerate-by-Inducing-Lef1-Expression-in-Fibroblasts-)).

378 **Microarray analysis.** The microarray data were previously published (GEO GSE11186) (Lin et  
379 al., 2009). RMA normalization was used, and the bottom twentieth percentile of genes were  
380 excluded from the analysis.

381 **Data availability.** All data presented in this manuscript are available from the authors upon  
382 request. The detail analysis of scRNA-Seq and RNA velocity can be found at  
383 [https://github.com/DriskellLab/Priming-Skin-to-Regenerate-by-Inducing-Lef1-Expression-in-  
384 Fibroblasts-](https://github.com/DriskellLab/Priming-Skin-to-Regenerate-by-Inducing-Lef1-Expression-in-Fibroblasts-). We have also generated a web resource that allows for easy access to our data  
385 through a query-based display of our scRNA-Seq analysis, available at  
386 <https://skinregeneration.org/>. This website will be continuously updated with more dataset and  
387 analysis.

### 388 **Acknowledgements**

389 This work was supported by WSU New Faculty Seed Grant 2428-9926. The authors would like to  
390 acknowledge Sean Thompson, Jonathan Jones, Kai Kretzschmar, and Klaas Mulder for their  
391 discussion and help. The authors would also like to acknowledge the Washington State University  
392 Franceschi Microscopy Imaging Center for the continued support in microscopic imaging, and  
393 Jared Brannan for generation of our web resource.

### 394 **Author Contributions**

395 QP performed and designed the experiments, analyzed the data, and co-wrote the manuscript.  
396 GF, LS, GGH, BW, and IMD assisted in performing and designing experiments. RRD conceived

397 of the project, assisted in experimental design, performed data analysis, and co-wrote the  
398 manuscript.

399

400 **Figure and Legends**

Figure 1: Phan et al. 2020

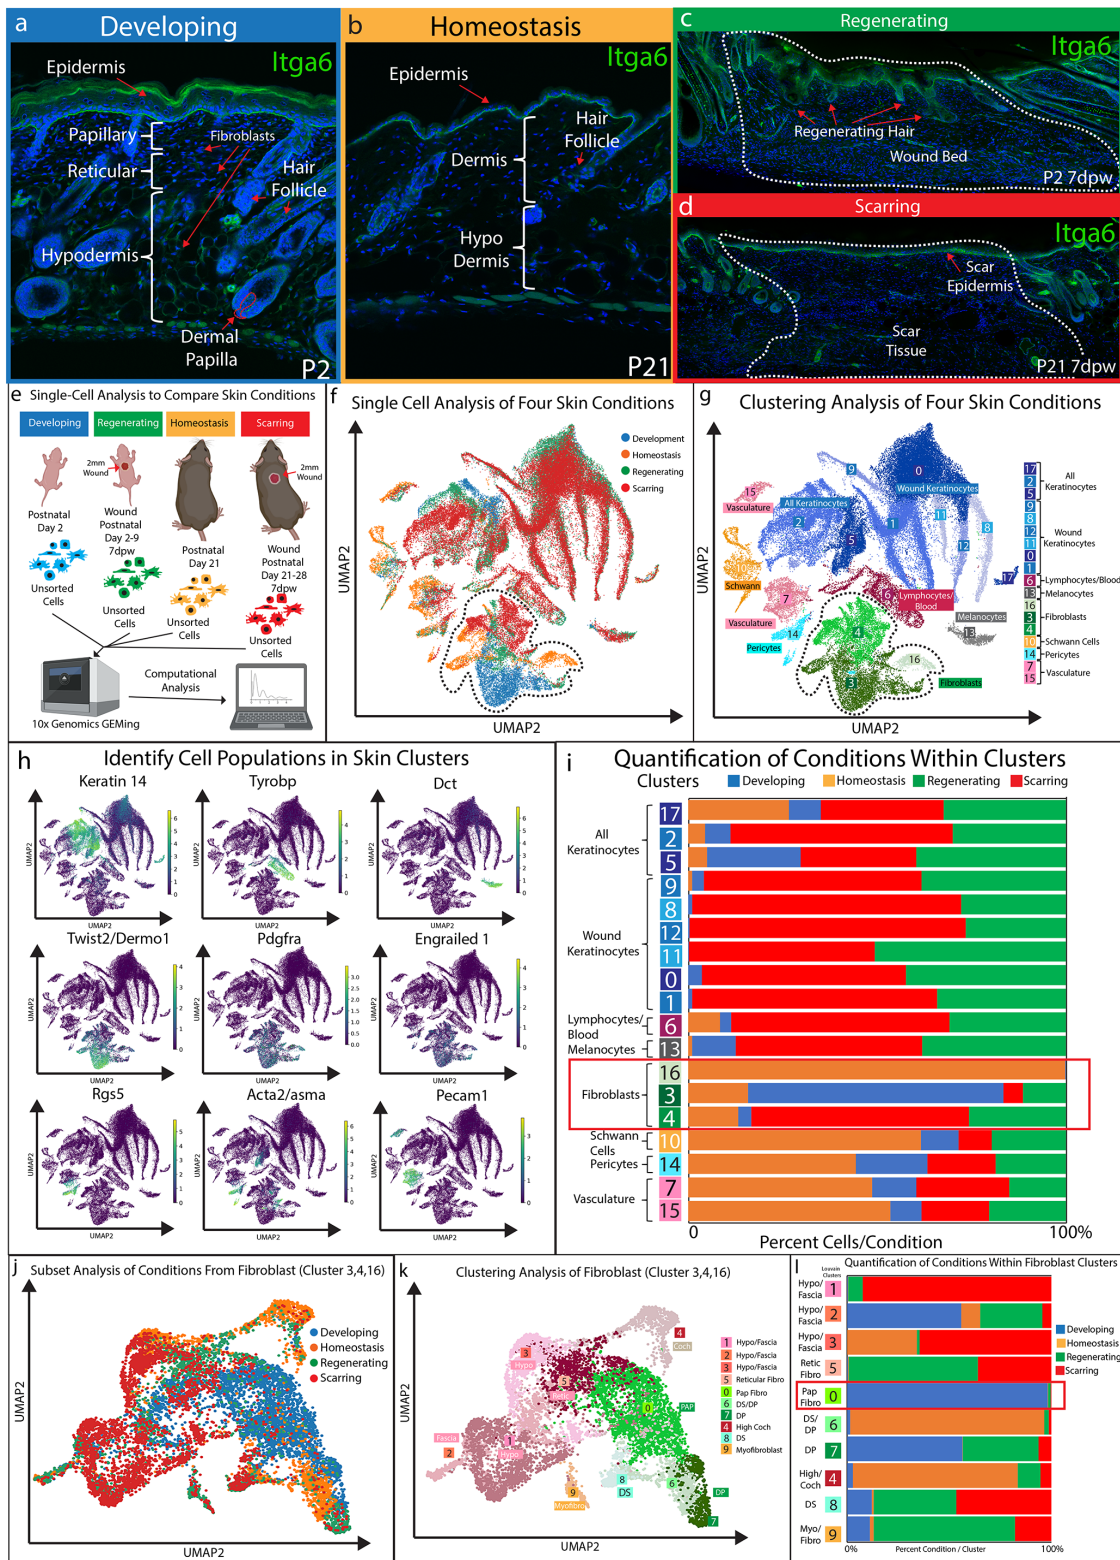

401

402 **Figure 1: Fibroblasts in Developing skin are distinct from Regenerating, Scarring, and**  
403 **Homeostatic Conditions.** (a-d) Immunostaining analysis and histological map of the dermis in  
404 Developing Post-natal day 2 (P2) skin (a), Homeostatic skin at P21 (b), skin undergoing  
405 regeneration P2 7 days post wound (7dwp) (c), and skin repairing a wound via scarring P21 7dpw  
406 (d). (e) Schematic representation of single cell isolation, library preparation, and sequencing  
407 analysis for unsorted cells from Developing (P2), Regenerating (P2 7dpw), Homeostatic (P21),  
408 and Scarring (P21 7dpw) conditions. (f) UMAP visualization of all cell populations for all  
409 conditions. Each cell is color coded based according to condition as labeled. (g) Clustering  
410 analysis of the UMAP plot, color coded based on cell types. (h) Overlaying gene expression on  
411 UMAP clusters to identify cell types. (i) Quantification of the percentage of all cells represented  
412 within a cluster. (j) Subset and re-clustering of Cluster 3,4,16 by computational integration. (k)  
413 Cluster analysis of integrated fibroblast clusters 3,4,16. (l) Quantitation of fibroblasts within each  
414 cluster represented by condition.

Figure 2: Phan et al. 2020

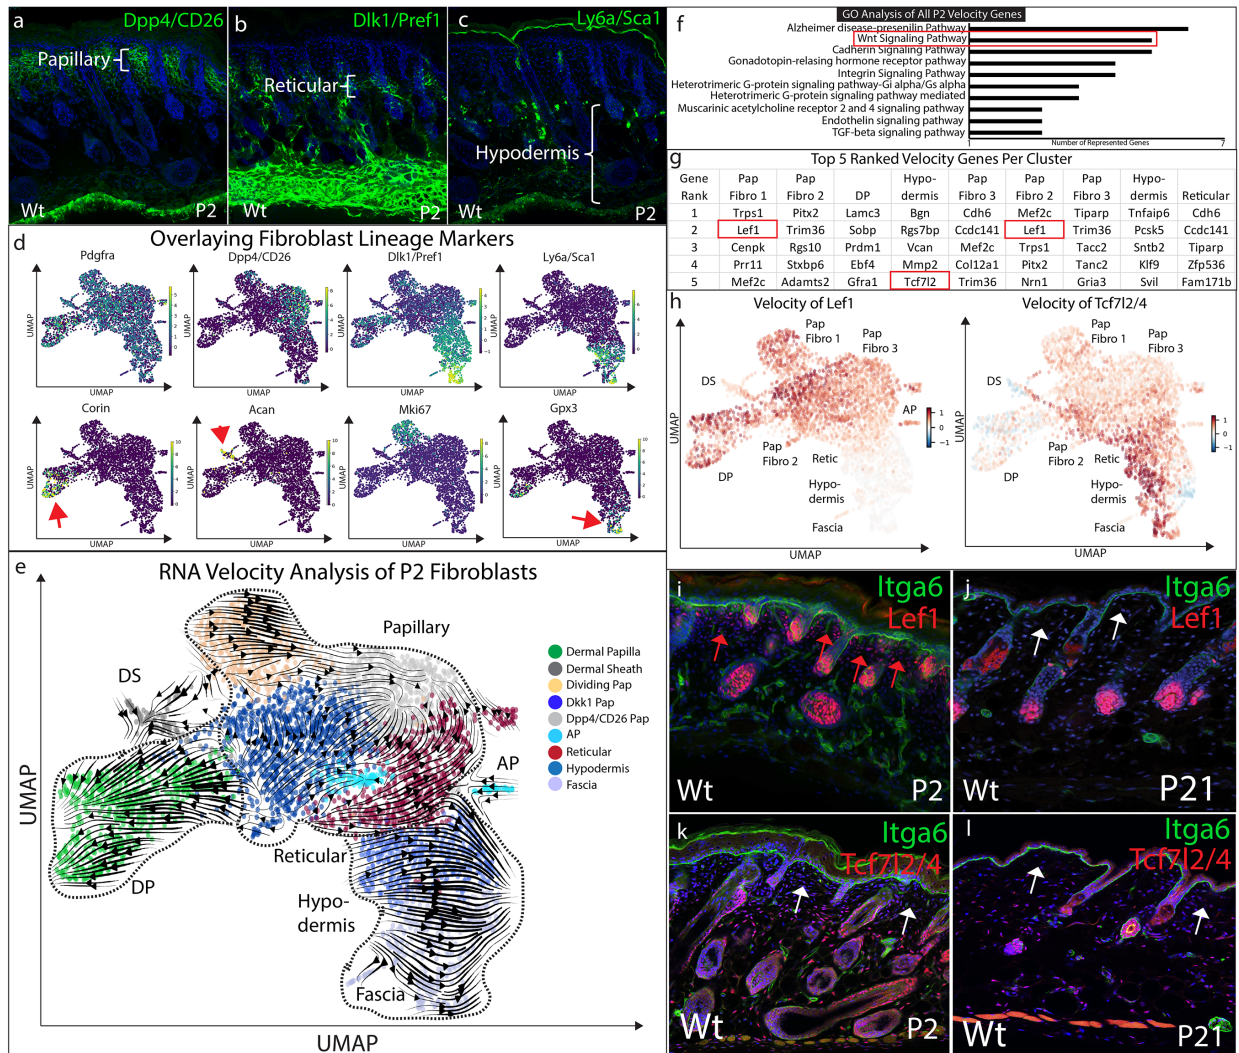

415

416 **Figure 2: Papillary fibroblast lineage trajectory is defined by Lef1 in RNA Velocity analysis.**

417 (a-c) Immunostaining Developing (P2) skin for Papillary (a) (Dpp4/CD26),

418 Reticular/Hypodermal (b) (Dlk1/Pref1), and Hypodermal makers (c) (Ly6a/Sca1). (d) Overlaying

419 fibroblast lineage markers on UMAP projections of Developing fibroblasts. (e) RNA Velocity

420 analysis over layed on UMAP projection of clustered fibroblasts. Clusters are colored coded and

421 labeled. (f) GO Analysis of 195 driver genes of RNA Velocity for Developing fibroblasts. (g) Top

422 5 Velocity driver genes of Developing fibroblast clusters. (h) Overlaying Lef1 and Tcf7l2/4 velocity

423 on UMAP projections of Developmental fibroblast. (i-l) Immunostaining Developing (P2) and

424 Homeostatic (P21) time points for Lef1 and Tcf7l2/4 expression and counterstained with Itga6.  
 425 Red arrows indicate areas of papillary dermis expressing Lef1. White arrows indicate papillary  
 426 dermal region.

Figure 3: Phan et al. 2020

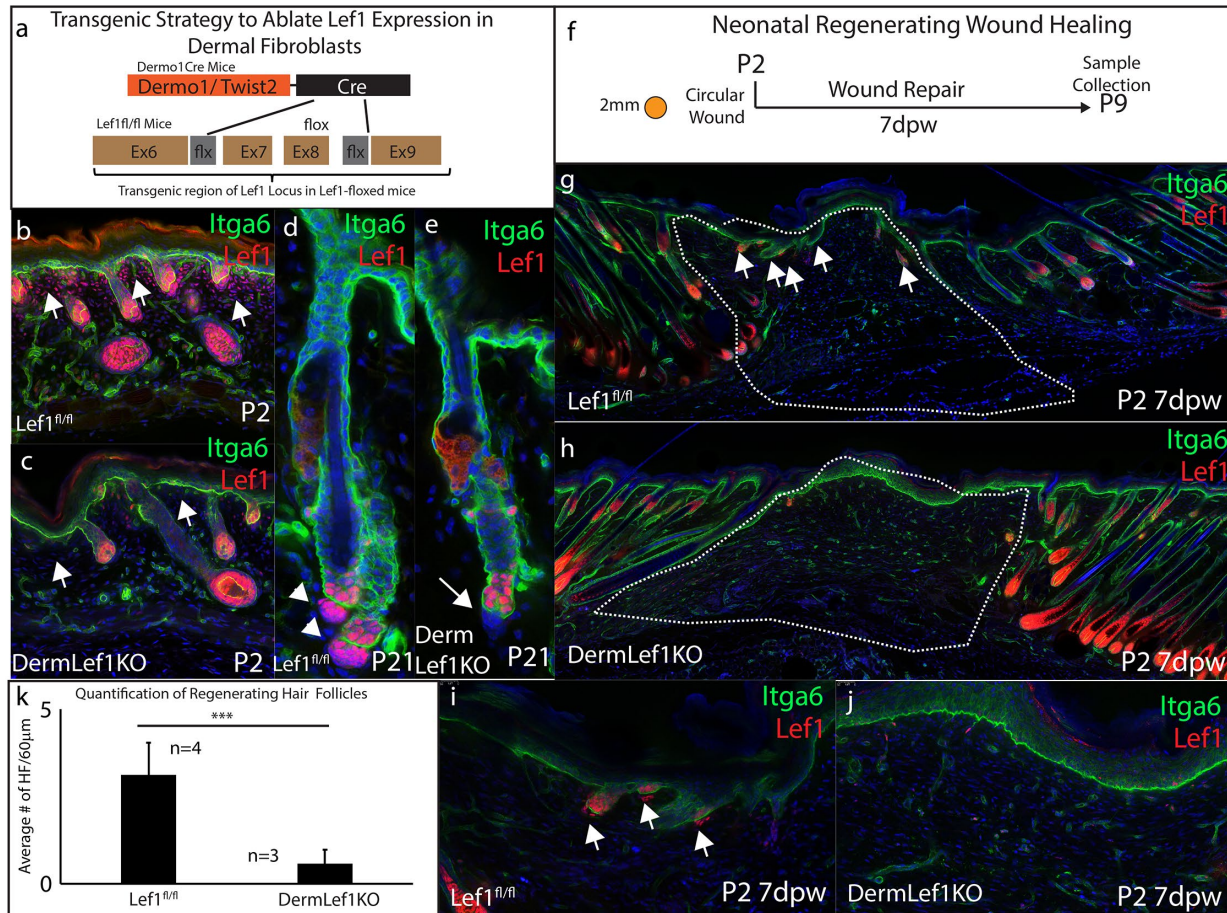

427  
 428 **Figure 3: Dermal Lef1 is required to support hair follicle regeneration in neonatal wounds.**  
 429 (a) Schematic representation of transgenic strategy to ablate Lef1 expression in dermal  
 430 fibroblasts. (b-e) Verifying dermal Lef1 ablation by immunostaining. White arrows indicate  
 431 papillary regions (b-c) or dermal papilla (d-e). (f) Schematic describing 2mm circular wounds and  
 432 harvest times to test if dermal Lef1 is required for regeneration. (g-i) Immunostaining of P2 7 days  
 433 post wound (7dpw) skin for Itga6 and Lef1. Wound beds are highlighted by white outline. White

434 arrows indicate regenerating hair follicles. (k) Quantification of regenerating hair follicles in  
 435 wounds beds of n=4 Lef1fl/fl (wt) and n=3 DermLef1KO mice.  $p < 0.003$

Figure 4: Phan et al. 2020

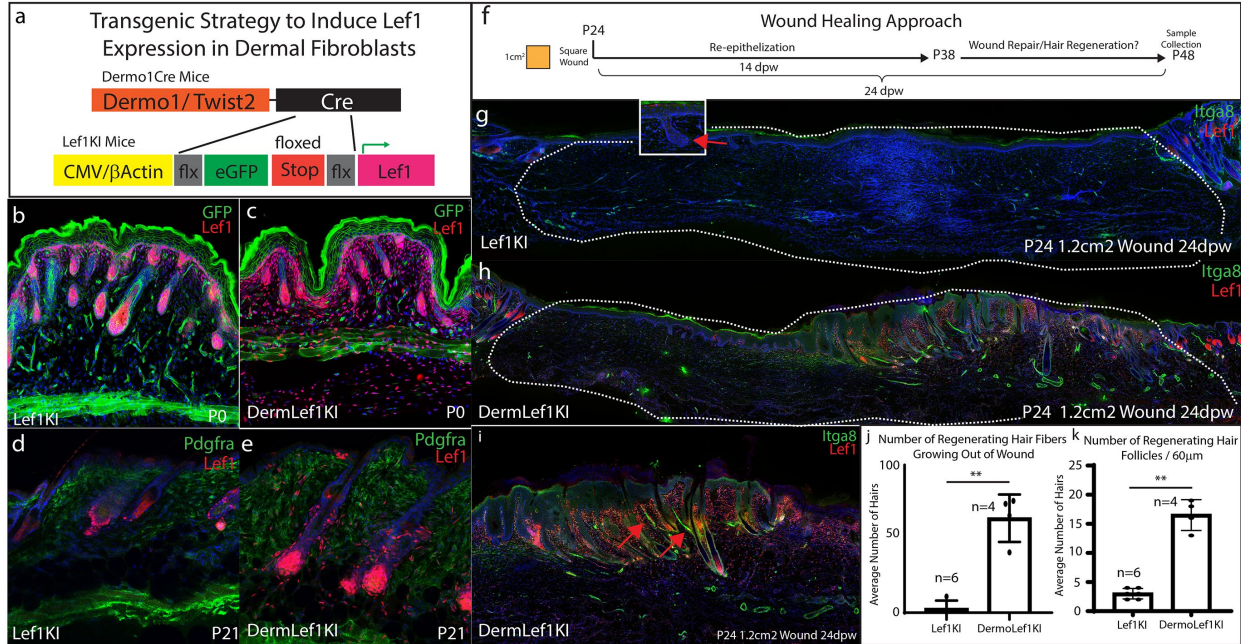

436  
 437 **Figure 4: Lef1 expression in dermal fibroblast enhances skin regeneration in large wounds.**

438 (a) Schematic representation of transgenic strategy to ectopically express Lef1 in fibroblasts  
 439 during development, homeostasis and wound healing. (b-c) Immunostaining for Lef1 and GFP in  
 440 P0 Lef1KI and DermLef1KI (Dermo1Cre+/Lef1KI+) mice. (d-e) Immunostaining for Lef1 and  
 441 PDGFRa in P21 Lef1KI and DermLef1KI mice. (f) Schematic representation of wound healing  
 442 approach. (g-k) Immunostaining tissue for Lef1 and Itga8 (arrector pili) from the wounds of Lef1KI  
 443 and DermLef1KI mice. Regenerating hair follicles in Lef1KI mice can be found by red arrows.  
 444 Wound beds are marked by red squares. High resolution area of regenerating hair follicles in  
 445 DermLef1Ki mice (i). (j) Quantification of regenerating hair follicles growing out of the wound beds  
 446 of Lef1KI n=6 and DermLef1KI n=4 mice  $p < 0.004$ . (k) Quantification of regenerating hair follicles  
 447 detected in 60 µm sections of wound beds.  $p < 0.001$

Figure 5: Phan et al. 2020

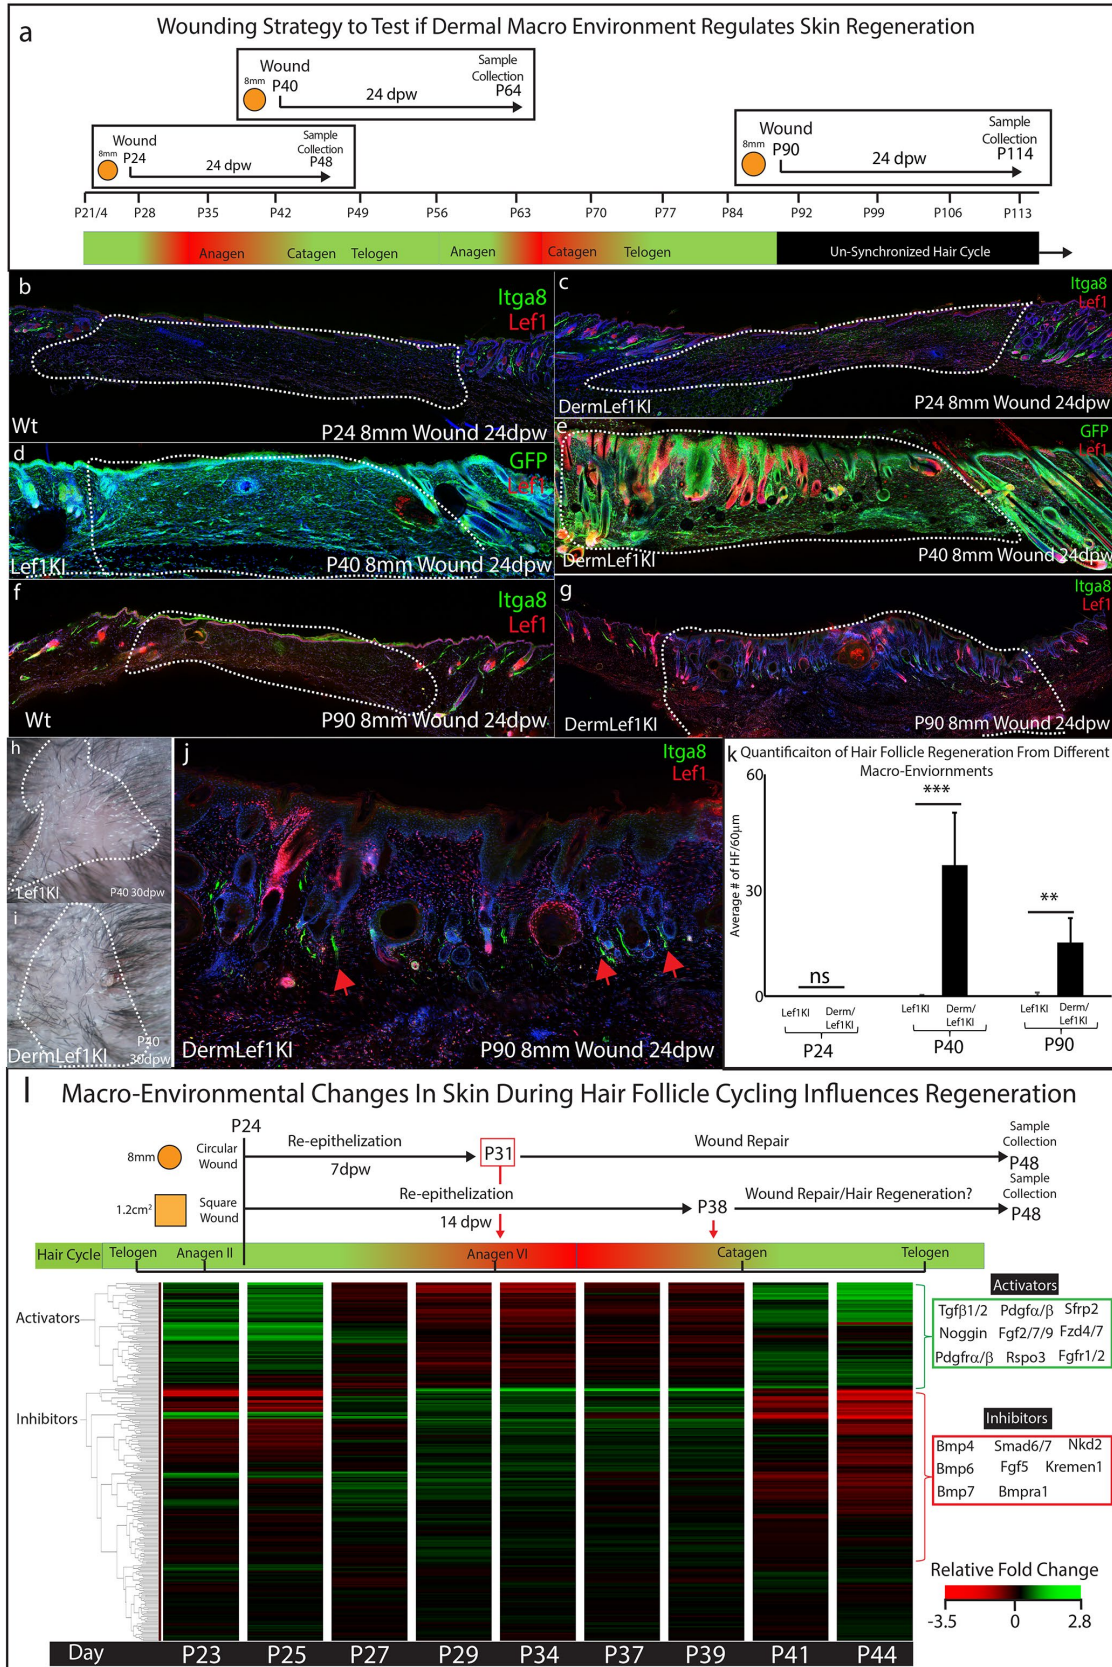



449 **Figure 5: Lef1 expression in dermal fibroblasts enhances skin regeneration in permissive**  
 450 **macro environments.** (a) Schematic of the differential wound healing analysis from different time  
 451 points of the hair follicle cycle in murine skin. (b-g,j) Immunostaining analysis of wounds 24dpw  
 452 from P24 (b-d), P40 (d-e), and P90 (f-g,j). Sections were stained for either Itga8 and Lef1 (b-c,f-  
 453 g,j) or GFP and Lef1 (d-e). Itga8 labels arrector pili. (h-i) Macroscopic analysis of wound beds  
 454 from Wt (Lef1KI) and DermLef1KI mice. Hair follicles could be seen growing out of the wound bed  
 455 of DermLef1KI mice. (k) Quantification of the average number of regenerating hair follicles  
 456 detected in wounds beds of 60  $\mu$ m sections from P24 (ns) 24dpw ( $p < 0.0009$ ), P40 24dpw, and  
 457 P90 24dpw ( $p < 0.007$ ). (l) Schematic representation of different wound healing approaches above  
 458 a heatmap of microarray data (Lin et al., 2009) from key time points during hair follicle cycling.  
 459 Heatmap is generated from a list of Activator and Inhibitor genes reported to regulate the  
 460 progression of the hair follicle cycle (Wang et al., 2017).

Supp Fig1: Phan et al. 2020

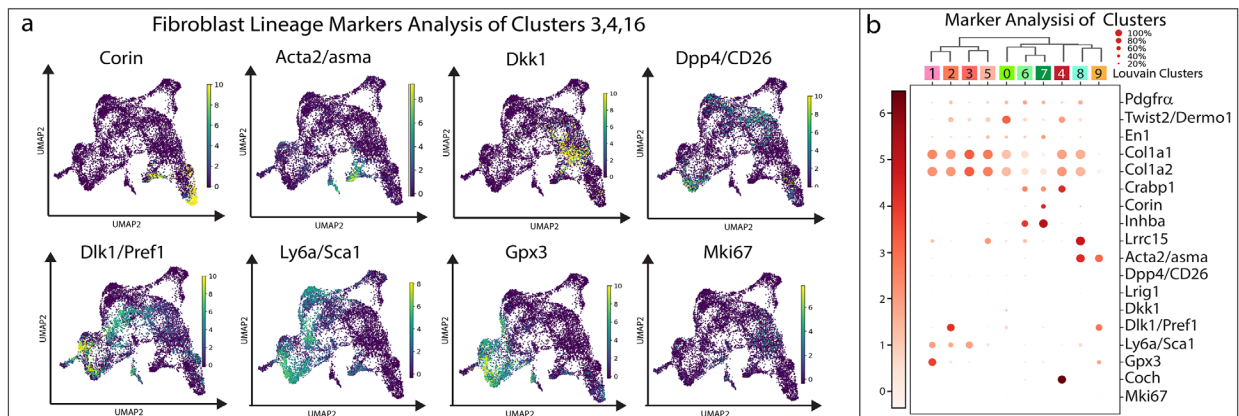

461

462 **Supplemental Figure 1: Classifying fibroblast clusters and conditions in Development,**  
 463 **Regeneration, Scarring, and Homeostasis.** (a) Over-laying gene expression for cell markers  
 464 on UMAP plots. (b) Dotplot of genes based on expression in cluster.

465

Supp Fig 2: Phan et al. 2020

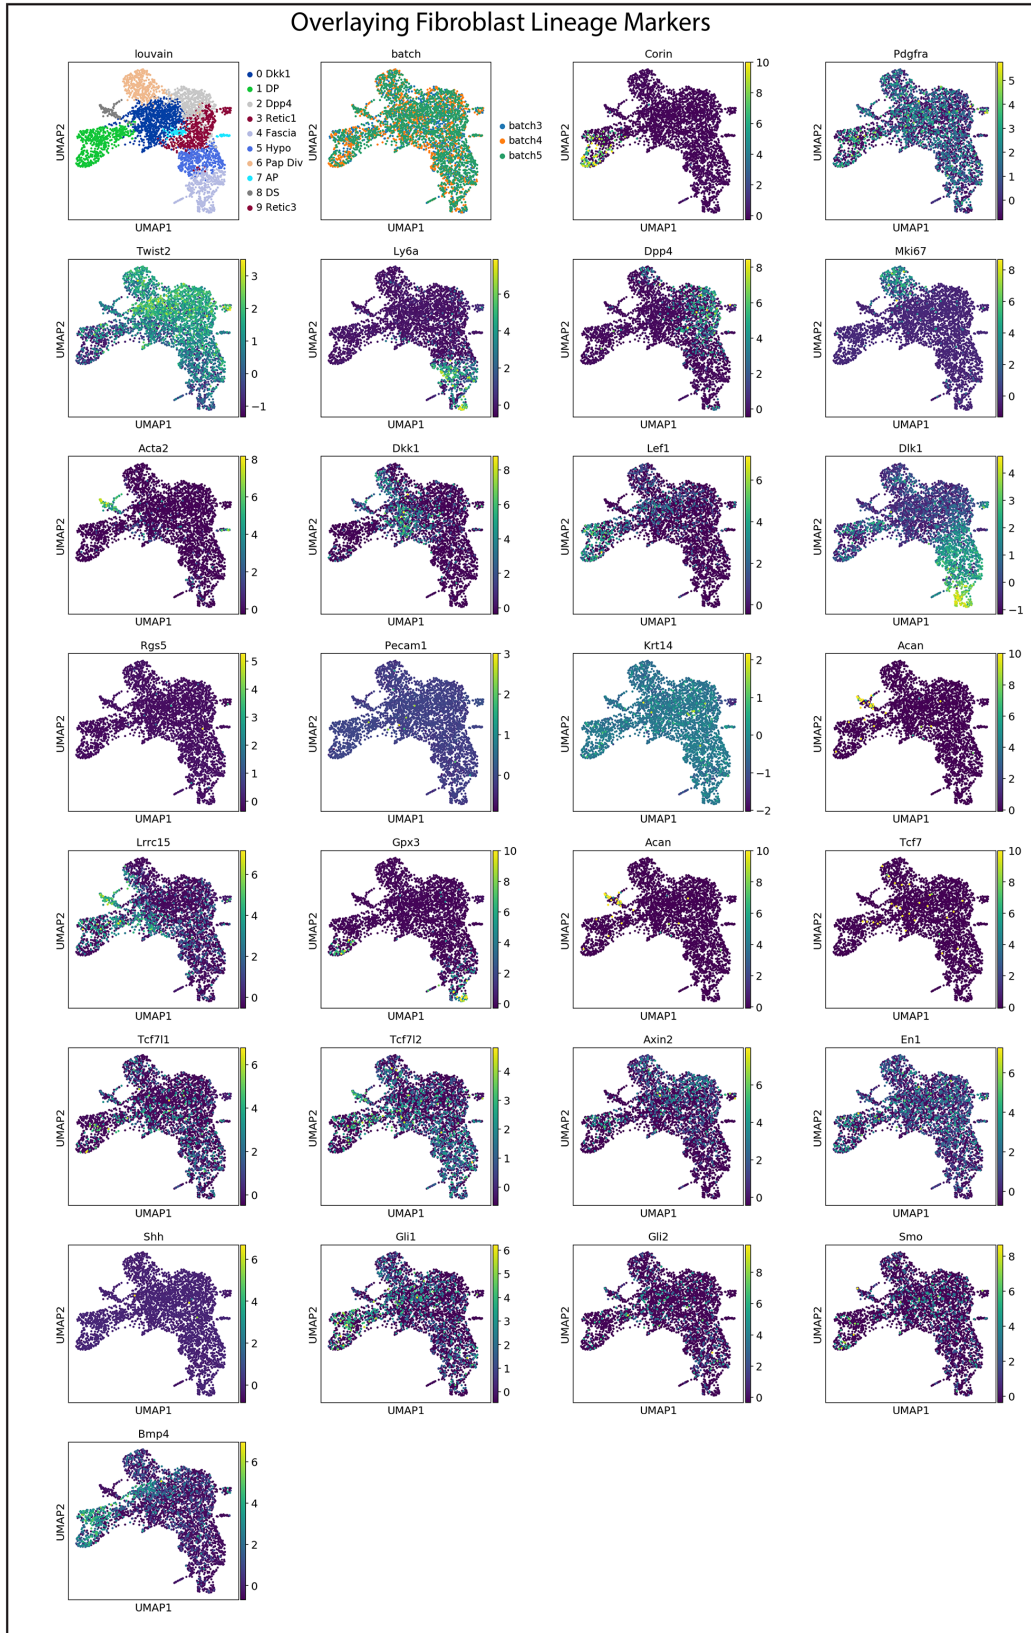

467 **Supplemental Figure 2: Classifying fibroblast clusters in Developing fibroblasts.** (a) Over-  
468 laying gene expression for fibroblast lineage markers.

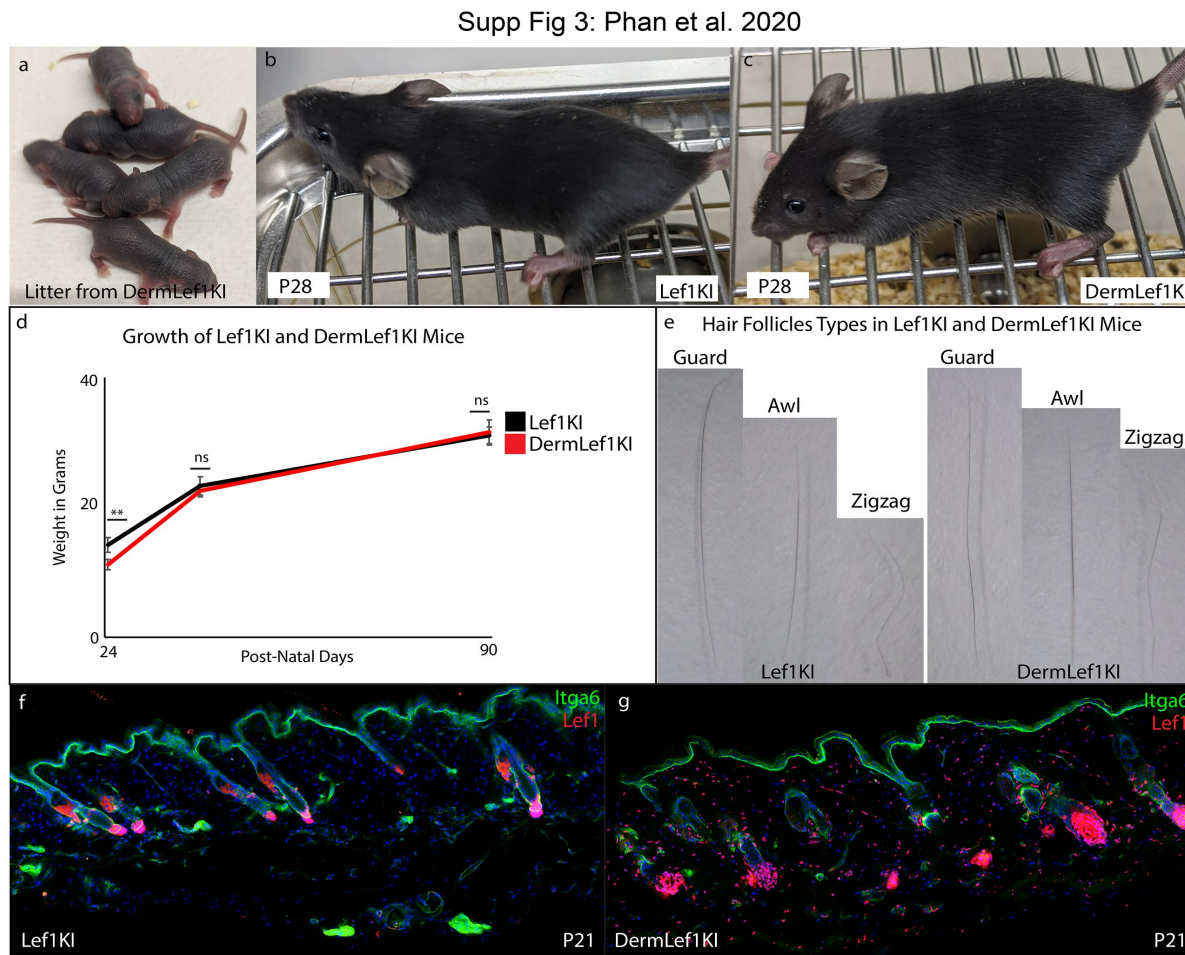

469

470 **Supplemental Figure 3: DermLef1KI mice does not show overt phenotypic variations.** (a)

471 Images of P4 litter from DermLef1KI mice revealing viability of line. (b-c) P28 of wild type (b) and

472 DermLef1KI (c) mice. (d) The growth curve of Wt (Lef1KI) mice compared to DermLef1KI mice at

473 P24, P40, and P90. P24  $p < 0.005$ . (e) Macroscopic images of different hair follicle types from Wt

474 (Lef1KI) and DermLef1KI hair follicles. (f-g) Immunostaining analysis of sections from P21 skin

475 from Wt (Lef1KI) and DermLef1KI mice stained for Itga6 and Lef1.

Supp Fig 4: Phan et al. 2020

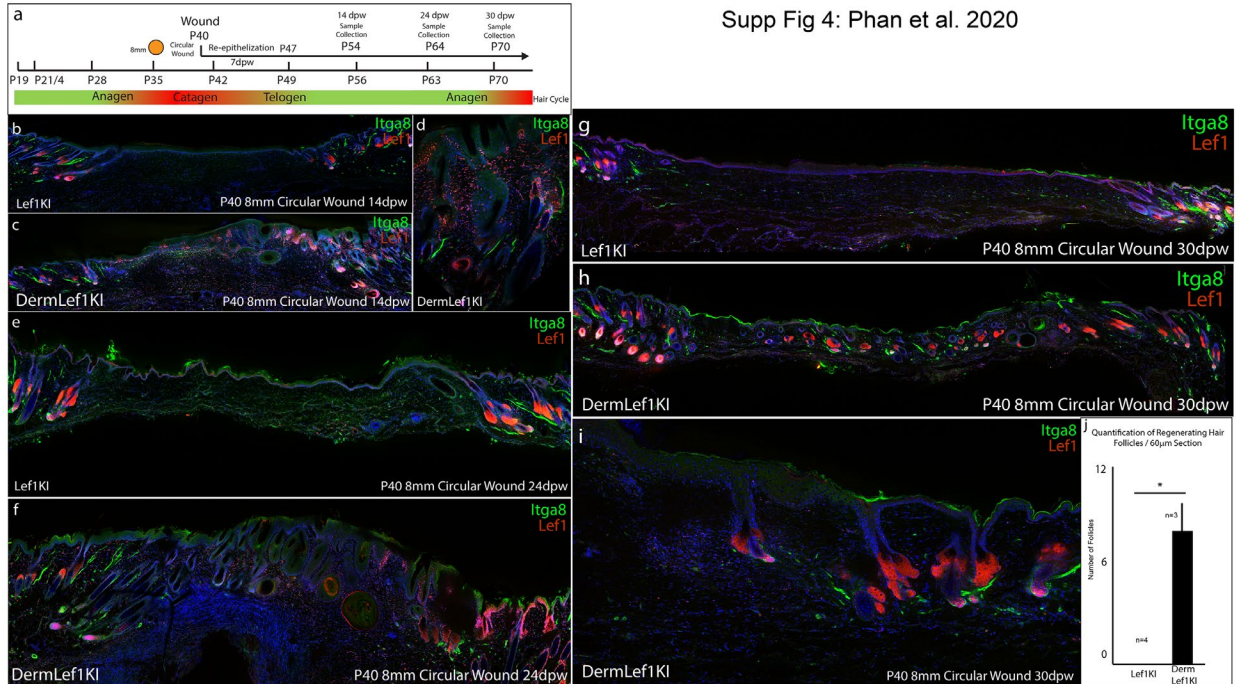

476

477 **Supplemental Figure 4: Analysis of the regenerative potential of DermLef1KI wounds at**

478 **P40.** (a) Schematic describing the wounding and tissue collection strategy. (b-j) Immunostaining

479 analysis of wild type (Lef1KI) and DermLef1KI mice wounded at P40 and collected at 14 dpw (b-

480 d), 24dpw (e-f), and 30dpw (g-i). All sections were immunostained for Itga8 and Lef1. (j)

481 Quantification of hair follicles in 60µm sections of Wt (Lef1KI) and DermLef1KI skin 30dpw. p <

482 0.04

483

484

485

## Bibliography

- 486 Abaci, H.E., Coffman, A., Doucet, Y., Chen, J., Jackow, J., Wang, E., Guo, Z., Shin, J.U., Jahoda, C.A., and  
487 Christiano, A.M. (2018). Tissue engineering of human hair follicles using a biomimetic developmental  
488 approach. *Nat Commun* 9, 5301.
- 489 Adam, R.C., Yang, H., Ge, Y., Lien, W.H., Wang, P., Zhao, Y., Polak, L., Levorse, J., Baksh, S.C., Zheng, D., *et*  
490 *al.* (2018). Temporal Layering of Signaling Effectors Drives Chromatin Remodeling during Hair Follicle  
491 Stem Cell Lineage Progression. *Cell Stem Cell* 22, 398-413 e397.
- 492 Ansell, D.M., Kloppper, J.E., Thomason, H.A., Paus, R., and Hardman, M.J. (2011). Exploring the "hair  
493 growth-wound healing connection": anagen phase promotes wound re-epithelialization. *J Invest*  
494 *Dermatol* 131, 518-528.
- 495 Chen, D., Jarrell, A., Guo, C., Lang, R., and Atit, R. (2012). Dermal beta-catenin activity in response to  
496 epidermal Wnt ligands is required for fibroblast proliferation and hair follicle initiation. *Development*  
497 139, 1522-1533.
- 498 Chen, J.S., Longaker, M.T., and Gurtner, G.C. (2013). Murine models of human wound healing. *Methods*  
499 *Mol Biol* 1037, 265-274.
- 500 Collins, C.A., Kretzschmar, K., and Watt, F.M. (2011). Reprogramming adult dermis to a neonatal state  
501 through epidermal activation of beta-catenin. *Development* 138, 5189-5199.
- 502 Correa-Gallegos, D., Jiang, D., Christ, S., Ramesh, P., Ye, H., Wannemacher, J., Kalgudde Gopal, S., Yu, Q.,  
503 Aichler, M., Walch, A., *et al.* (2019). Patch repair of deep wounds by mobilized fascia. *Nature* 576, 287-  
504 292.
- 505 Driskell, R.R., Lichtenberger, B.M., Hoste, E., Kretzschmar, K., Simons, B.D., Charalambous, M., Ferron,  
506 S.R., Haurault, Y., Pavlovic, G., Ferguson-Smith, A.C., *et al.* (2013). Distinct fibroblast lineages determine  
507 dermal architecture in skin development and repair. *Nature* 504, 277-281.
- 508 Driskell, R.R., and Watt, F.M. (2015). Understanding fibroblast heterogeneity in the skin. *Trends Cell Biol*  
509 25, 92-99.
- 510 Enshell-Seijffers, D., Lindon, C., Kashiwagi, M., and Morgan, B.A. (2010). beta-catenin activity in the  
511 dermal papilla regulates morphogenesis and regeneration of hair. *Dev Cell* 18, 633-642.
- 512 Enshell-Seijffers, D., Lindon, C., and Morgan, B.A. (2008). The serine protease Corin is a novel modifier of  
513 the Agouti pathway. *Development* 135, 217-225.
- 514 Fan, H., Oro, A.E., Scott, M.P., and Khavari, P.A. (1997). Induction of basal cell carcinoma features in  
515 transgenic human skin expressing Sonic Hedgehog. *Nat Med* 3, 788-792.
- 516 Gay, D., Ghinatti, G., Guerrero-Juarez, C.F., Ferrer, R.A., Ferri, F., Lim, C.H., Murakami, S., Gault, N.,  
517 Barroca, V., Rombeau, I., *et al.* (2020). Phagocytosis of Wnt inhibitor SFRP4 by late wound macrophages  
518 drives chronic Wnt activity for fibrotic skin healing. *Sci Adv* 6, eaay3704.
- 519 Gay, D., Kwon, O., Zhang, Z., Spata, M., Plikus, M.V., Holler, P.D., Ito, M., Yang, Z., Treffeisen, E., Kim,  
520 C.D., *et al.* (2013). Fgf9 from dermal gammadelta T cells induces hair follicle neogenesis after wounding.  
521 *Nat Med* 19, 916-923.
- 522 Ge, Y., Miao, Y., Gur-Cohen, S., Gomez, N., Yang, H., Nikolova, M., Polak, L., Hu, Y., Verma, A., Elemento,  
523 O., *et al.* (2020). The aging skin microenvironment dictates stem cell behavior. *Proc Natl Acad Sci U S A*  
524 117, 5339-5350.
- 525 Grachtchouk, M., Mo, R., Yu, S., Zhang, X., Sasaki, H., Hui, C.C., and Dlugosz, A.A. (2000). Basal cell  
526 carcinomas in mice overexpressing Gli2 in skin. *Nat Genet* 24, 216-217.
- 527 Guerrero-Juarez, C.F., Dedhia, P.H., Jin, S., Ruiz-Vega, R., Ma, D., Liu, Y., Yamaga, K., Shestova, O., Gay,  
528 D.L., Yang, Z., *et al.* (2019). Single-cell analysis reveals fibroblast heterogeneity and myeloid-derived  
529 adipocyte progenitors in murine skin wounds. *Nat Commun* 10, 650.

530 Haensel, D., Jin, S., Sun, P., Cinco, R., Dragan, M., Nguyen, Q., Cang, Z., Gong, Y., Vu, R., MacLean, A.L., *et*  
531 *al.* (2020). Defining Epidermal Basal Cell States during Skin Homeostasis and Wound Healing Using  
532 Single-Cell Transcriptomics. *Cell Rep* 30, 3932-3947 e3936.

533 Hamburg-Shields, E., DiNuoscio, G.J., Mullin, N.K., Lafyatis, R., and Atit, R.P. (2015). Sustained beta-  
534 catenin activity in dermal fibroblasts promotes fibrosis by up-regulating expression of extracellular  
535 matrix protein-coding genes. *J Pathol* 235, 686-697.

536 Haydont, V., Bernard, B.A., and Fortunel, N.O. (2019). Age-related evolutions of the dermis: Clinical  
537 signs, fibroblast and extracellular matrix dynamics. *Mech Ageing Dev* 177, 150-156.

538 Heitman, N., Sennett, R., Mok, K.W., Saxena, N., Srivastava, D., Martino, P., Grisanti, L., Wang, Z.,  
539 Ma'ayan, A., Rompolas, P., *et al.* (2020). Dermal sheath contraction powers stem cell niche relocation  
540 during hair cycle regression. *Science* 367, 161-166.

541 Hu, M.S., Borrelli, M.R., Hong, W.X., Malhotra, S., Cheung, A.T.M., Ransom, R.C., Rennert, R.C., Morrison,  
542 S.D., Lorenz, H.P., and Longaker, M.T. (2018). Embryonic skin development and repair. *Organogenesis*  
543 14, 46-63.

544 Ito, M., Yang, Z., Andl, T., Cui, C., Kim, N., Millar, S.E., and Cotsarelis, G. (2007). Wnt-dependent de novo  
545 hair follicle regeneration in adult mouse skin after wounding. *Nature* 447, 316-320.

546 Jamora, C., DasGupta, R., Kocieniewski, P., and Fuchs, E. (2003). Links between signal transduction,  
547 transcription and adhesion in epithelial bud development. *Nature* 422, 317-322.

548 Jensen, K.B., Driskell, R.R., and Watt, F.M. (2010). Assaying proliferation and differentiation capacity of  
549 stem cells using disaggregated adult mouse epidermis. *Nat Protoc* 5, 898-911.

550 Jiang, D., Correa-Gallegos, D., Christ, S., Stefanska, A., Liu, J., Ramesh, P., Rajendran, V., De Santis, M.M.,  
551 Wagner, D.E., and Rinkevich, Y. (2018). Two succeeding fibroblastic lineages drive dermal development  
552 and the transition from regeneration to scarring. *Nat Cell Biol* 20, 422-431.

553 Jiang, T.X., Harn, H.I., Ou, K.L., Lei, M., and Chuong, C.M. (2019). Comparative regenerative biology of  
554 spiny (*Acomys cahirinus*) and laboratory (*Mus musculus*) mouse skin. *Exp Dermatol* 28, 442-449.

555 Johnston, A.P., Naska, S., Jones, K., Jinno, H., Kaplan, D.R., and Miller, F.D. (2013). Sox2-mediated  
556 regulation of adult neural crest precursors and skin repair. *Stem Cell Reports* 1, 38-45.

557 Joost, S., Annusver, K., Jacob, T., Sun, X., Dalessandri, T., Sivan, U., Sequeira, I., Sandberg, R., and Kasper,  
558 M. (2020). The Molecular Anatomy of Mouse Skin during Hair Growth and Rest. *Cell Stem Cell* 26, 441-  
559 457 e447.

560 Joost, S., Jacob, T., Sun, X., Annusver, K., La Manno, G., Sur, I., and Kasper, M. (2018). Single-Cell  
561 Transcriptomics of Traced Epidermal and Hair Follicle Stem Cells Reveals Rapid Adaptations during  
562 Wound Healing. *Cell Rep* 25, 585-597 e587.

563 Joost, S., Zeisel, A., Jacob, T., Sun, X., La Manno, G., Lonnerberg, P., Linnarsson, S., and Kasper, M.  
564 (2016). Single-Cell Transcriptomics Reveals that Differentiation and Spatial Signatures Shape Epidermal  
565 and Hair Follicle Heterogeneity. *Cell Syst* 3, 221-237 e229.

566 Kaushal, G.S., Rognoni, E., Lichtenberger, B.M., Driskell, R.R., Kretzschmar, K., Hoste, E., and Watt, F.M.  
567 (2015). Fate of Proliferating Dermal Papilla Cells during Homeostasis, Wound Healing and Wnt  
568 Activation. *J Invest Dermatol* 135, 2926-2934.

569 La Manno, G., Soldatov, R., Zeisel, A., Braun, E., Hochgerner, H., Petukhov, V., Lidschreiber, K., Kastri, M.E.,  
570 Lonnerberg, P., Furlan, A., *et al.* (2018). RNA velocity of single cells. *Nature* 560, 494-498.

571 Lim, C.H., Sun, Q., Ratti, K., Lee, S.H., Zheng, Y., Takeo, M., Lee, W., Rabbani, P., Plikus, M.V., Cain, J.E., *et*  
572 *al.* (2018). Hedgehog stimulates hair follicle neogenesis by creating inductive dermis during murine skin  
573 wound healing. *Nat Commun* 9, 4903.

574 Lin, K.K., Kumar, V., Geyfman, M., Chudova, D., Ihler, A.T., Smyth, P., Paus, R., Takahashi, J.S., and  
575 Andersen, B. (2009). Circadian clock genes contribute to the regulation of hair follicle cycling. *PLoS*  
576 *Genet* 5, e1000573.

577 Lo, D.D., Zimmermann, A.S., Nauta, A., Longaker, M.T., and Lorenz, H.P. (2012). Scarless fetal skin wound  
578 healing update. *Birth Defects Res C Embryo Today* 96, 237-247.

579 Lynch, T.J., Anderson, P.J., Xie, W., Crooke, A.K., Liu, X., Tyler, S.R., Luo, M., Kusner, D.M., Zhang, Y., Neff,  
580 T., *et al.* (2016). Wnt Signaling Regulates Airway Epithelial Stem Cells in Adult Murine Submucosal  
581 Glands. *Stem Cells* 34, 2758-2771.

582 Marcos-Garcés, V., Molina Aguilar, P., Bea Serrano, C., García Bustos, V., Benavent Seguí, J., Ferrández  
583 Izquierdo, A., and Ruiz-Sauri, A. (2014). Age-related dermal collagen changes during development,  
584 maturation and ageing - a morphometric and comparative study. *J Anat* 225, 98-108.

585 Mastrogiannaki, M., Lichtenberger, B.M., Reimer, A., Collins, C.A., Driskell, R.R., and Watt, F.M. (2016).  
586 beta-Catenin Stabilization in Skin Fibroblasts Causes Fibrotic Lesions by Preventing Adipocyte  
587 Differentiation of the Reticular Dermis. *J Invest Dermatol* 136, 1130-1142.

588 Mok, K.W., Saxena, N., Heitman, N., Grisanti, L., Srivastava, D., Muraro, M.J., Jacob, T., Sennett, R.,  
589 Wang, Z., Su, Y., *et al.* (2019). Dermal Condensate Niche Fate Specification Occurs Prior to Formation  
590 and Is Placode Progenitor Dependent. *Dev Cell* 48, 32-48 e35.

591 Müller-Rover, S., Handjiski, B., van der Veen, C., Eichmüller, S., Foitzik, K., McKay, I.A., Stenn, K.S., and  
592 Paus, R. (2001). A comprehensive guide for the accurate classification of murine hair follicles in distinct  
593 hair cycle stages. *J Invest Dermatol* 117, 3-15.

594 Myung, P.S., Takeo, M., Ito, M., and Atit, R.P. (2013). Epithelial Wnt ligand secretion is required for adult  
595 hair follicle growth and regeneration. *J Invest Dermatol* 133, 31-41.

596 Nguyen, H., Merrill, B.J., Polak, L., Nikolova, M., Rendl, M., Shaver, T.M., Pasolli, H.A., and Fuchs, E.  
597 (2009). Tcf3 and Tcf4 are essential for long-term homeostasis of skin epithelia. *Nat Genet* 41, 1068-1075.

598 Nusse, R., and Clevers, H. (2017). Wnt/beta-Catenin Signaling, Disease, and Emerging Therapeutic  
599 Modalities. *Cell* 169, 985-999.

600 Oro, A.E., Higgins, K.M., Hu, Z., Bonifas, J.M., Epstein, E.H., Jr., and Scott, M.P. (1997). Basal cell  
601 carcinomas in mice overexpressing sonic hedgehog. *Science* 276, 817-821.

602 Philippeos, C., Telerman, S.B., Oules, B., Pisco, A.O., Shaw, T.J., Elgueta, R., Lombardi, G., Driskell, R.R.,  
603 Soldin, M., Lynch, M.D., *et al.* (2018). Spatial and Single-Cell Transcriptional Profiling Identifies  
604 Functionally Distinct Human Dermal Fibroblast Subpopulations. *J Invest Dermatol* 138, 811-825.

605 Plikus, M.V., Guerrero-Juarez, C.F., Ito, M., Li, Y.R., Dedhia, P.H., Zheng, Y., Shao, M., Gay, D.L., Ramos,  
606 R., Hsi, T.C., *et al.* (2017). Regeneration of fat cells from myofibroblasts during wound healing. *Science*  
607 355, 748-752.

608 Plikus, M.V., Mayer, J.A., de la Cruz, D., Baker, R.E., Maini, P.K., Maxson, R., and Chuong, C.M. (2008).  
609 Cyclic dermal BMP signalling regulates stem cell activation during hair regeneration. *Nature* 451, 340-  
610 344.

611 Polanski, K., Young, M.D., Miao, Z., Meyer, K.B., Teichmann, S.A., and Park, J.E. (2020). BBKNN: fast  
612 batch alignment of single cell transcriptomes. *Bioinformatics* 36, 964-965.

613 Rinkevich, Y., Walmsley, G.G., Hu, M.S., Maan, Z.N., Newman, A.M., Drukker, M., Janusz, M., Krampitz,  
614 G.W., Gurtner, G.C., Lorenz, H.P., *et al.* (2015). Skin fibrosis. Identification and isolation of a dermal  
615 lineage with intrinsic fibrogenic potential. *Science* 348, aaa2151.

616 Rognoni, E., Gomez, C., Pisco, A.O., Rawlins, E.L., Simons, B.D., Watt, F.M., and Driskell, R.R. (2016).  
617 Inhibition of beta-catenin signalling in dermal fibroblasts enhances hair follicle regeneration during  
618 wound healing. *Development* 143, 2522-2535.

619 Salz, L., and Driskell, R.R. (2017). Horizontal Whole Mount: A Novel Processing and Imaging Protocol for  
620 Thick, Three-dimensional Tissue Cross-sections of Skin. *J Vis Exp*.

621 Salzer, M.C., Lafzi, A., Berenguer-Llargo, A., Youssif, C., Castellanos, A., Solanas, G., Peixoto, F.O.,  
622 Stephan-Otto Attolini, C., Prats, N., Aguilera, M., *et al.* (2018). Identity Noise and Adipogenic Traits  
623 Characterize Dermal Fibroblast Aging. *Cell* 175, 1575-1590 e1522.

624 Schmidt, B.A., and Horsley, V. (2013). Intra-dermal adipocytes mediate fibroblast recruitment during skin  
625 wound healing. *Development* 140, 1517-1527.

626 Seifert, A.W., Kiama, S.G., Seifert, M.G., Goheen, J.R., Palmer, T.M., and Maden, M. (2012). Skin  
627 shedding and tissue regeneration in African spiny mice (*Acomys*). *Nature* 489, 561-565.

628 Sun, X., Are, A., Annusver, K., Sivan, U., Jacob, T., Dalessandri, T., Joost, S., Fullgrabe, A., Gerling, M., and  
629 Kasper, M. (2020). Coordinated hedgehog signaling induces new hair follicles in adult skin. *Elife* 9.

630 Telerman, S.B., Rognoni, E., Sequeira, I., Pisco, A.O., Lichtenberger, B.M., Culley, O., Viswanathan, P.,  
631 Driskell, R.R., and Watt, F.M. (2017). Dermal Blimp1 acts downstream of epidermal TGFbeta and  
632 Wnt/beta-catenin to regulate hair follicle formation and growth. *J Invest Dermatol*.

633 Walmsley, G.G., Hu, M.S., Hong, W.X., Maan, Z.N., Lorenz, H.P., and Longaker, M.T. (2015a). A mouse  
634 fetal skin model of scarless wound repair. *J Vis Exp*, 52297.

635 Walmsley, G.G., Maan, Z.N., Wong, V.W., Duscher, D., Hu, M.S., Zielins, E.R., Wearda, T., Muhonen, E.,  
636 McArdle, A., Tevlin, R., *et al.* (2015b). Scarless wound healing: chasing the holy grail. *Plast Reconstr Surg*  
637 135, 907-917.

638 Wang, Q., Oh, J.W., Lee, H.L., Dhar, A., Peng, T., Ramos, R., Guerrero-Juarez, C.F., Wang, X., Zhao, R.,  
639 Cao, X., *et al.* (2017). A multi-scale model for hair follicles reveals heterogeneous domains driving rapid  
640 spatiotemporal hair growth patterning. *Elife* 6.

641 Wolf, F.A., Angerer, P., and Theis, F.J. (2018). SCANPY: large-scale single-cell gene expression data  
642 analysis. *Genome Biol* 19, 15.

643 Yang, C.C., and Cotsarelis, G. (2010). Review of hair follicle dermal cells. *J Dermatol Sci* 57, 2-11.

644 Yu, S., Zhou, X., Steinke, F.C., Liu, C., Chen, S.C., Zagorodna, O., Jing, X., Yokota, Y., Meyerholz, D.K.,  
645 Mullighan, C.G., *et al.* (2012). The TCF-1 and LEF-1 transcription factors have cooperative and opposing  
646 roles in T cell development and malignancy. *Immunity* 37, 813-826.

647
